# Supplementary material
Source: PubMed Central journal article supplement (PMC7138347)
Supplement: NIHMS1553363-supplement-Supp_Fig1.pdf [file NIHMS1553363-supplement-Supp_Fig1.pdf]

Extended Data Figure 1b

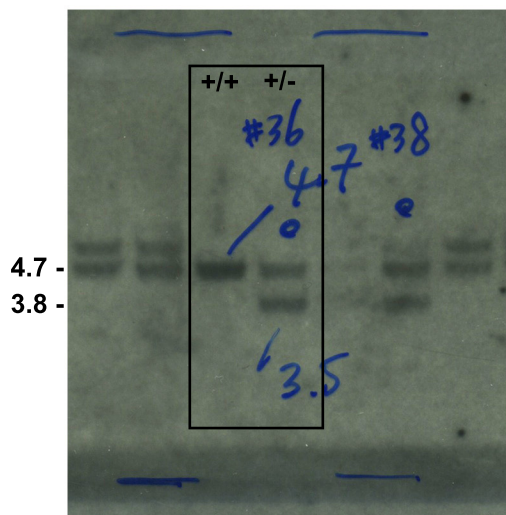

Extended Data Figure 7b

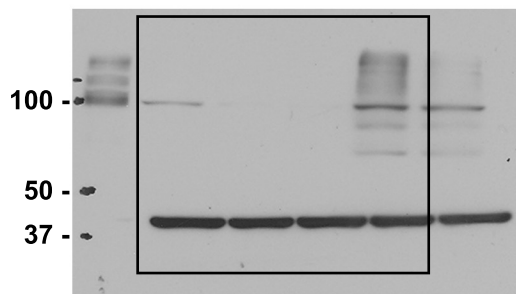

Extended Data Figure 7c

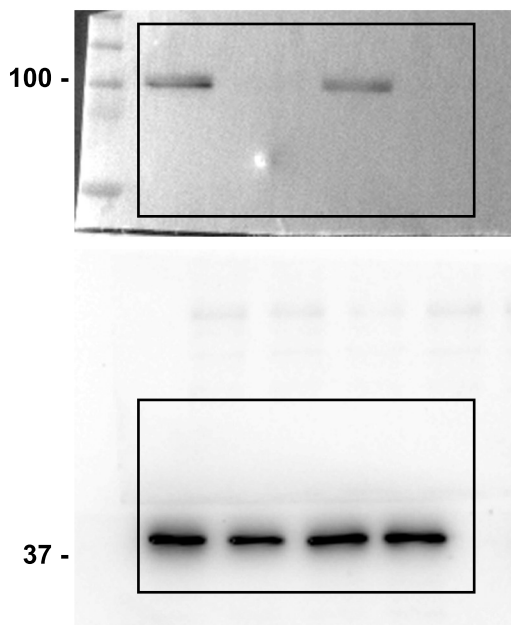

Extended Data Figure 7d

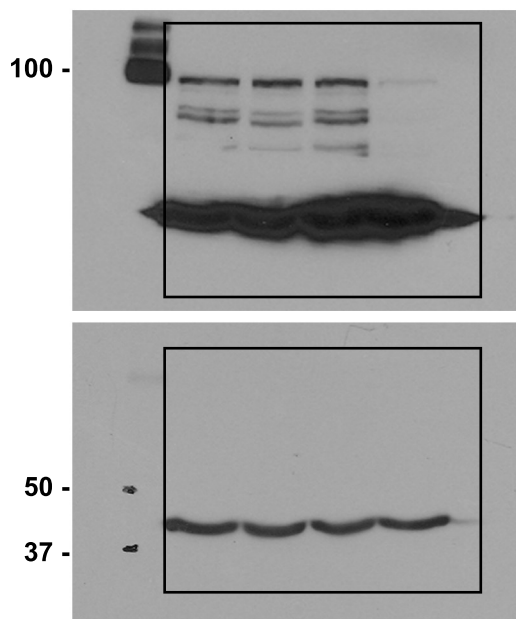

**Supplementary figure 1. Uncropped original gel electrophoresis data.** The extended Data figures that include each image are shown above each gel, with a black outline to show the excerpted portion.
